# Supplementary material for: Social inequalities in pregnancy metabolic profile: findings from the multi-ethnic Born in Bradford cohort study
Source: Springer Nature journal article supplement (doi:10.1186/s12884-024-06538-4), 2024-04-30
Supplement: MOESM2 [file 27043630]

**Additional File 2: Table S1.** Results of latent class models with 2 to 6 classes

| Model                                 | BIC    | LMR      | Entropy | Class size (%)                                                            |
|---------------------------------------|--------|----------|---------|---------------------------------------------------------------------------|
| <i>White European and South Asian</i> |        |          |         |                                                                           |
| k = 2                                 | 211332 | P<0.0001 | 0.85    | 5388 (64.8), 2921 (35.2)                                                  |
| k = 3                                 | 207011 | P<0.0001 | 0.79    | 3138 (37.8), 2824 (34.0), 2347 (28.2)                                     |
| k = 4                                 | 205778 | P<0.0001 | 0.78    | 2815 (33.9), 2790 (33.6), 1662 (20.0), 1042 (12.5)                        |
| k = 5                                 | 205063 | P<0.0001 | 0.77    | 2623 (31.6), 1627 (19.6), 1526 (18.4), 1460 (17.6), 1073 (12.9)           |
| k = 6                                 | 204584 | P=0.5    | 0.75    | 2182 (26.3), 1617 (19.5), 1491 (17.9), 1459 (17.6), 864 (10.4), 696 (8.4) |
| <i>White European</i>                 |        |          |         |                                                                           |
| k = 2                                 | 92589  | P<0.0001 | 0.881   | 2367 (60.6), 1538 (39.4)                                                  |
| k = 3                                 | 90849  | P<0.0001 | 0.835   | 1955 (50.1), 1088 (27.9), 862 (22.1)                                      |
| k = 4                                 | 89853  | P<0.0001 | 0.829   | 1776 (45.5), 832 (21.3), 692 (17.7), 605 (15.5)                           |
| k = 5                                 | 89443  | P<0.0001 | 0.793   | 1360 (34.8), 726 (18.6), 641 (16.4), 590 (15.1), 588 (15.1)               |
| k = 6                                 | 89328  | P=0.2    | 0.788   | 1295 (33.2), 709 (18.2), 613 (15.7), 548 (14.0), 475 (12.2), 265 (6.8)    |
| <i>South Asian</i>                    |        |          |         |                                                                           |
| k = 2                                 | 112418 | P<0.0001 | 0.831   | 2964 (67.3), 1440 (32.7)                                                  |
| k = 3                                 | 110784 | P<0.0001 | 0.757   | 1879 (42.7), 1315 (29.9), 1210 (27.5)                                     |
| k = 4                                 | 110556 | P=0.6    | 0.727   | 1447 (32.9), 1206 (27.4), 1133 (25.7), 618 (14.0)                         |
| k = 5                                 | 110442 | P=0.2    | 0.728   | 1372 (31.2), 1144 (26.0), 924 (21.0), 659 (15.0), 305 (6.9)               |
| k = 6                                 | 110348 | P=0.05   | 0.710   | 1320 (30.0), 971 (22.0), 649 (14.7), 646 (14.7), 519 (11.8), 299 (6.8)    |
| <i>White British</i>                  |        |          |         |                                                                           |
| k = 2                                 | 86542  | P<0.0001 | 0.885   | 2172 (59.3), 1493 (40.7)                                                  |
| k = 3                                 | 84859  | P<0.0001 | 0.840   | 1834 (50.0), 1017 (27.7), 814 (22.2)                                      |
| k = 4                                 | 83920  | P<0.0001 | 0.835   | 1689 (46.1), 765 (20.9), 654 (17.8), 557 (15.2)                           |
| k = 5                                 | 83481  | P<0.0001 | 0.800   | 1284 (35.0), 680 (18.9), 605 (16.5), 549 (15.0), 547 (14.9)               |
| k = 6                                 | 83412  | P=0.4    | 0.795   | 1238 (33.8), 657 (17.9), 568 (15.5), 506 (13.8), 453 (12.4), 243 (6.6)    |
| <i>Pakistani</i>                      |        |          |         |                                                                           |
| k = 2                                 | 97618  | P<0.0001 | 0.831   | 2561 (67.2), 1248 (32.8)                                                  |
| k = 3                                 | 96530  | P<0.0001 | 0.736   | 1592 (41.8), 1153 (30.3), 1064 (27.9)                                     |
| k = 4                                 | 96352  | P=0.08   | 0.714   | 1192 (31.3), 1039 (27.3), 973 (25.5), 605 (15.9)                          |
| k = 5                                 | 96280  | P=0.5    | 0.701   | 1117 (29.3), 902 (23.7), 875 (23.0), 583 (15.3), 332 (8.7)                |
| k = 6                                 | 96211  | P=0.1    | 0.702   | 1123 (29.5), 766 (20.1), 609 (16.0), 607 (15.9), 412 (10.8), 292 (7.7)    |

BIC: Bayesian information criteria; LMR: Lo-Mendell-Rubin adjusted likelihood ratio test
