# Supplementary material for: Social inequalities in pregnancy metabolic profile: findings from the multi-ethnic Born in Bradford cohort study
Source: Springer Nature journal article supplement (doi:10.1186/s12884-024-06538-4), 2024-04-30
Supplement: MOESM3 [file 27043630]

**Additional File 3: Table S2.** Comparison of study participants with those excluded due to missing data on metabolic traits and gestational age.

| Socioeconomic indicator                                    | White European       |                     | South Asian          |                     |
|------------------------------------------------------------|----------------------|---------------------|----------------------|---------------------|
|                                                            | Included<br>(n=3905) | Excluded<br>(n=530) | Included<br>(n=4404) | Excluded<br>(n=877) |
| Index of Multiple Deprivation [No. (%)]                    |                      |                     |                      |                     |
| Q1 (least deprived)                                        | 1947 (49.9)          | 249 (47.1)          | 960 (21.8)           | 178 (20.3)          |
| Q2                                                         | 1118 (28.6)          | 147 (27.8)          | 1638 (37.2)          | 345 (39.3)          |
| Q3 (most deprived)                                         | 839 (21.5)           | 133 (25.1)          | 1805 (41.0)          | 354 (40.4)          |
| Woman's education [No. (%)]                                |                      |                     |                      |                     |
| <5 GCSE equivalent                                         | 733 (21.0)           | 112 (23.8)          | 1057 (25.3)          | 214 (25.9)          |
| 5 GCSE equivalent                                          | 1308 (37.5)          | 154 (32.7)          | 1296 (31.0)          | 279 (33.7)          |
| A-level equivalent                                         | 675 (19.3)           | 79 (16.8)           | 568 (13.6)           | 105 (12.7)          |
| Higher than A-level                                        | 776 (22.2)           | 126 (26.8)          | 1254 (30.0)          | 230 (27.8)          |
| Baby's father's education [No. (%)]                        |                      |                     |                      |                     |
| <5 GCSE equivalent                                         | 663 (24.1)           | 90 (25.1)           | 650 (18.9)           | 126 (18.3)          |
| 5 GCSE equivalent                                          | 1000 (36.4)          | 109 (30.4)          | 1016 (29.5)          | 215 (31.2)          |
| A-level equivalent                                         | 470 (17.1)           | 72 (20.1)           | 418 (12.1)           | 73 (10.6)           |
| Higher than A-level                                        | 615 (22.4)           | 88 (24.5)           | 1365 (39.6)          | 276 (40.0)          |
| Woman's employment status [No. (%)]                        |                      |                     |                      |                     |
| Currently employed                                         | 2572 (65.9)          | 334 (63.0)          | 1211 (27.6)          | 238 (27.2)          |
| Previously employed                                        | 989 (25.3)           | 154 (29.1)          | 1269 (28.9)          | 313 (35.8)          |
| Never employed                                             | 342 (8.8)            | 42 (7.9)            | 1915 (43.6)          | 324 (37.0)          |
| Baby's father's employment status [No. (%)]                |                      |                     |                      |                     |
| Non-manual                                                 | 1824 (50.8)          | 246 (50.5)          | 1433 (34.5)          | 264 (31.5)          |
| Manual                                                     | 1068 (29.7)          | 147 (30.2)          | 1622 (39.0)          | 354 (42.2)          |
| Self-employed                                              | 368 (10.2)           | 46 (9.5)            | 825 (19.8)           | 158 (18.9)          |
| Unemployed                                                 | 332 (9.2)            | 48 (9.9)            | 279 (6.7)            | 62 (7.4)            |
| Means tested benefit [No. (%)]                             |                      |                     |                      |                     |
| Yes                                                        | 1383 (35.5)          | 175 (33.1)          | 1911 (43.5)          | 376 (43.0)          |
| No                                                         | 2508 (64.5)          | 354 (66.9)          | 2478 (56.5)          | 498 (57.0)          |
| How well mother and partner managing financially [No. (%)] |                      |                     |                      |                     |
| Living comfortably                                         | 1036 (26.7)          | 150 (28.5)          | 1213 (27.7)          | 236 (27.1)          |
| Doing alright                                              | 1607 (41.3)          | 195 (37.0)          | 1847 (42.2)          | 361 (41.5)          |
| Just about getting by                                      | 973 (25.0)           | 143 (27.1)          | 981 (22.4)           | 201 (23.1)          |
| Quite difficult or very difficult                          | 272 (7.0)            | 39 (7.4)            | 333 (7.6)            | 73 (8.4)            |
| Financial circumstance compared to year ago [No. (%)]      |                      |                     |                      |                     |
| Better off                                                 | 1101 (28.3)          | 160 (30.3)          | 1308 (30.1)          | 254 (29.5)          |
| Worse off                                                  | 1007 (25.9)          | 137 (26.0)          | 717 (16.5)           | 155 (18.0)          |
| About the same                                             | 1778 (45.8)          | 231 (43.8)          | 2315 (53.4)          | 453 (52.6)          |
| Able to afford two pairs of all-weather shoes [No. (%)]    |                      |                     |                      |                     |
| Yes                                                        | 3611 (96.1)          | 496 (96.3)          | 4269 (99.2)          | 846 (99.5)          |

|                                                                                 |             |            |             |            |
|---------------------------------------------------------------------------------|-------------|------------|-------------|------------|
| No                                                                              | 145 (3.9)   | 19 (83.7)  | 33 (0.8)    | 4 (0.5)    |
|                                                                                 |             |            |             |            |
| Able to afford a small amount of money to spend on yourself each week [No. (%)] |             |            |             |            |
| Yes                                                                             | 2966 (79.8) | 408 (81.0) | 3614 (86.5) | 710 (85.5) |
| No                                                                              | 751 (20.2)  | 96 (19.1)  | 565 (13.5)  | 120 (14.5) |
|                                                                                 |             |            |             |            |
| Able to afford to make regular savings of £10 a month [No. (%)]                 |             |            |             |            |
| Yes                                                                             | 2697 (74.3) | 364 (75.6) | 3294 (80.8) | 601 (77.2) |
| No                                                                              | 932 (25.7)  | 124 (25.4) | 783 (19.2)  | 178 (22.9) |
|                                                                                 |             |            |             |            |
| Housing tenure                                                                  |             |            |             |            |
| Owns outright                                                                   | 152 (4.2)   | 25 (5.0)   | 1068 (27.9) | 197 (25.4) |
| Mortgage                                                                        | 1845 (50.7) | 236 (47.3) | 2020 (52.7) | 427 (55.0) |
| Private landlord                                                                | 1050 (28.9) | 145 (29.1) | 484 (12.6)  | 108 (13.9) |
| Social housing                                                                  | 590 (16.2)  | 93 (18.6)  | 261 (6.8)   | 44 (5.7)   |
|                                                                                 |             |            |             |            |
| Overcrowding (person per room) ([No. (%)]                                       |             |            |             |            |
| Q1                                                                              | 2548 (65.4) | 328 (62.0) | 1547 (35.2) | 307 (35.1) |
| Q2                                                                              | 849 (21.8)  | 112 (21.2) | 1393 (31.7) | 294 (33.6) |
| Q3                                                                              | 500 (12.8)  | 89 (16.8)  | 1454 (33.1) | 275 (31.4) |
|                                                                                 |             |            |             |            |
| Up to date with bills [No. (%)]                                                 |             |            |             |            |
| Yes                                                                             | 3369 (88.1) | 454 (88.2) | 3854 (91.4) | 747 (89.1) |
| No                                                                              | 454 (11.9)  | 61 (11.8)  | 363 (8.6)   | 91 (10.9)  |
|                                                                                 |             |            |             |            |
| Able to afford to replace or repair major electrical goods [No. (%)]            |             |            |             |            |
| Yes                                                                             | 2485 (70.2) | 339 (72.0) | 3096 (79.2) | 616 (78.8) |
| No                                                                              | 1057 (29.8) | 132 (28.0) | 813 (20.8)  | 166 (21.2) |
|                                                                                 |             |            |             |            |
| Able to keep home warm enough in winter [No. (%)]                               |             |            |             |            |
| Yes                                                                             | 3761 (97.8) | 508 (96.6) | 4175 (96.0) | 822 (95.9) |
| No                                                                              | 84 (2.2)    | 18 (3.4)   | 172 (4.0)   | 42 (4.9)   |
|                                                                                 |             |            |             |            |
| Able to afford to replace any worn out furniture [No. (%)]                      |             |            |             |            |
| Yes                                                                             | 2437 (69.1) | 338 (70.7) | 2830 (72.8) | 560 (72.6) |
| No                                                                              | 1088 (30.9) | 140 (29.3) | 1059 (27.2) | 211 (27.4) |
|                                                                                 |             |            |             |            |
| Able to afford household contents insurance [No. (%)]                           |             |            |             |            |
| Yes                                                                             | 2407 (84.6) | 307 (84.8) | 2184 (82.2) | 407 (79.3) |
| No                                                                              | 438 (15.4)  | 55 (15.2)  | 474 (17.8)  | 106 (20.7) |
|                                                                                 |             |            |             |            |
| Able to afford to keep home in decent state of decoration [No. (%)]             |             |            |             |            |
| Yes                                                                             | 3581 (94.3) | 489 (95.0) | 3743 (88.3) | 740 (87.6) |
| No                                                                              | 215 (5.7)   | 26 (5.1)   | 497 (11.7)  | 105 (12.4) |
