# Supplementary material for: Social inequalities in pregnancy metabolic profile: findings from the multi-ethnic Born in Bradford cohort study
Source: Springer Nature journal article supplement (doi:10.1186/s12884-024-06538-4), 2024-04-30

**Additional File 4: Figure S1. Distribution of metabolic traits by ethnicity group**

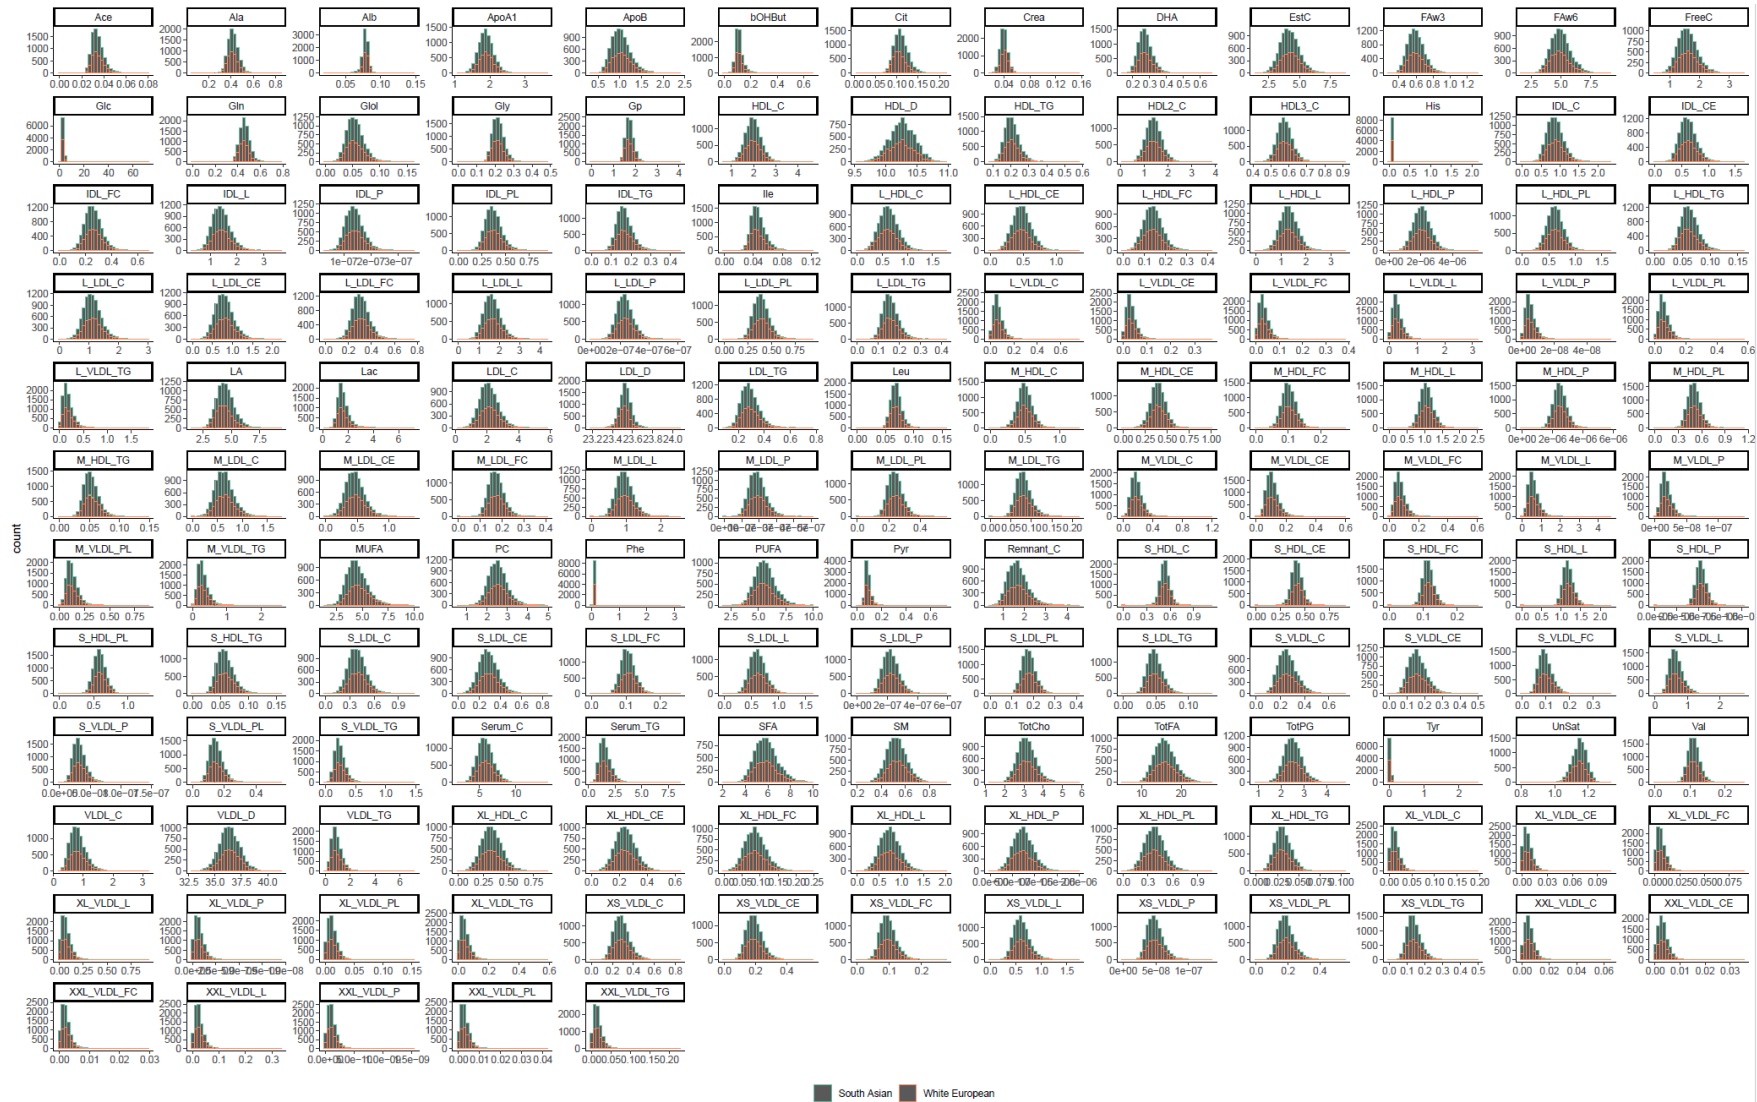

Supplement: MOESM4 [file 27043630]
