# Supplementary material for: Social inequalities in pregnancy metabolic profile: findings from the multi-ethnic Born in Bradford cohort study
Source: Springer Nature journal article supplement (doi:10.1186/s12884-024-06538-4), 2024-04-30

**Additional File 9: Figure S2.** Estimated mean probabilities for each SEP indicator variable in each ethnicity-specific SEP latent class sub-group in White British and Pakistani women.

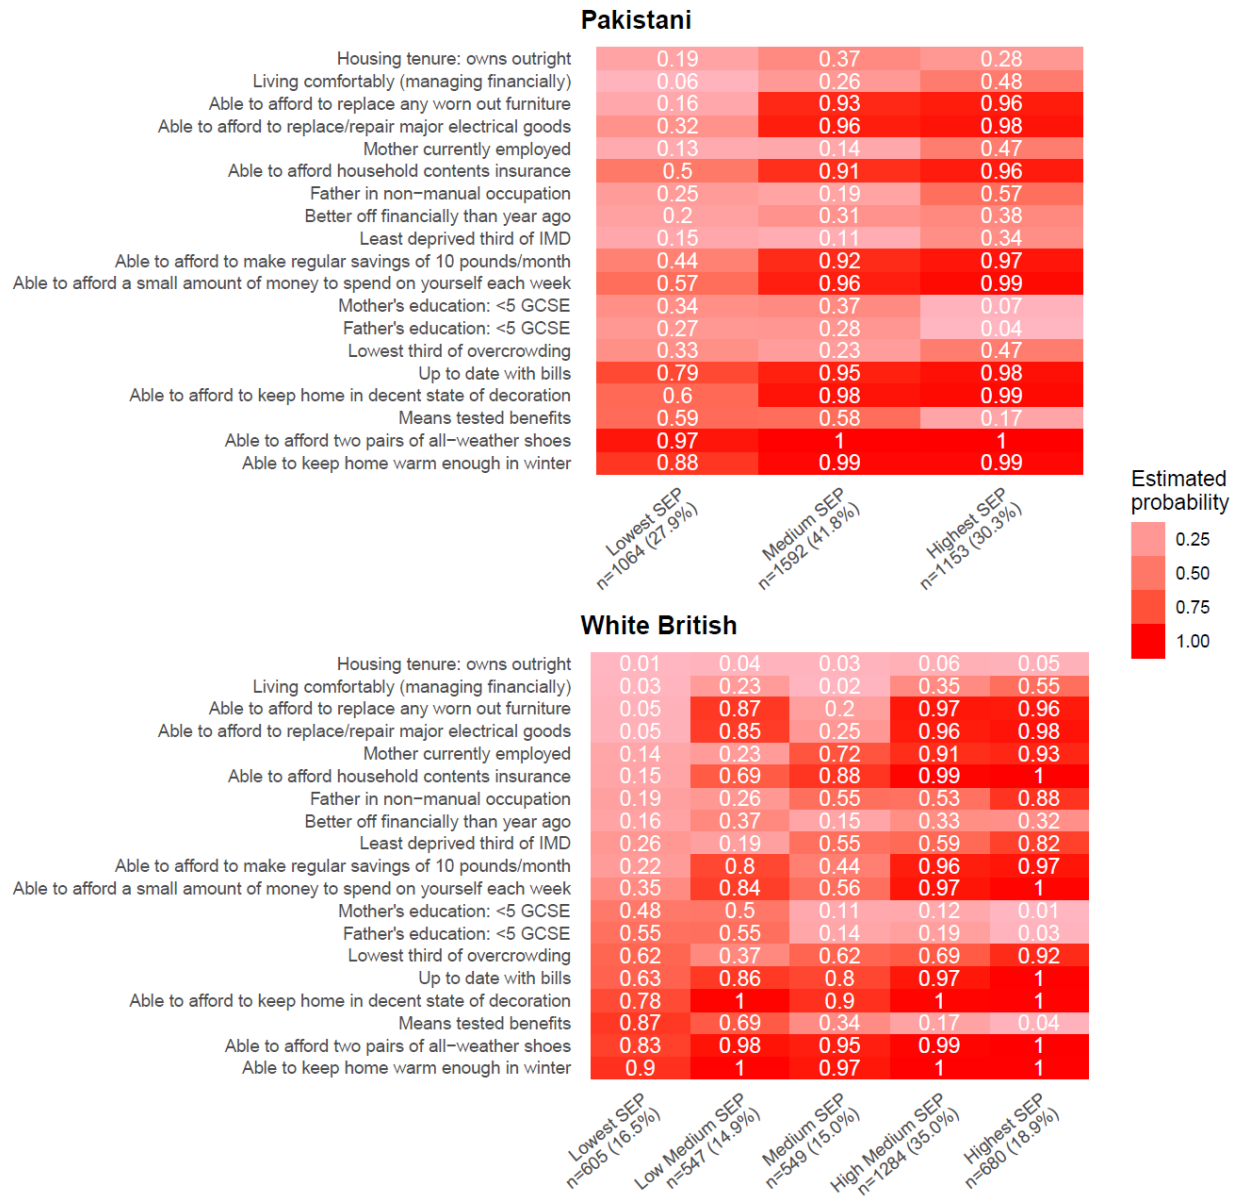

Supplement: MOESM9 [file 27043630]
